# Supplementary material for: ES-mediated chimera analysis revealed requirement of DDX6 for NANOS2 localization and function in mouse germ cells
Source: PubMed Central journal article supplement (PMC6345806; doi:10.1038/s41598-018-36502-0), 2019-01-24
Supplement: 41598_2018_36502_MOESM1_ESM.pdf [file 41598_2018_36502_MOESM1_ESM.pdf]

## Supplementary Information

ES-mediated chimera analysis revealed requirement of DDX6 for NANOS2  
localization and function in mouse germ cells

Ryuki Shimada, Makoto Kiso and Yumiko Saga

Contents:

Supplementary Figure S1-S5

Source data of Figure 2C

# Fig.S1

| ES #   | Aggregated | Transplanted blastocysts | Dissected at | Embryos recovered | ES contribution |        |         |
|--------|------------|--------------------------|--------------|-------------------|-----------------|--------|---------|
|        |            |                          |              |                   | 0 %             | 10-50% | 50-100% |
| TGOC#8 | 22         | 22                       | E14.5        | 5                 | 0               | 1      | 4       |
| TGOC#8 | 56         | 50                       | E16,5        | 15                | 2               | 1      | 12      |

| #  | Stage | Chimerism | Gonad  |
|----|-------|-----------|--------|
| M1 | E14.5 | 100       | Testis |
| M2 | E14.5 | 30        | Testis |
| M3 | E14.5 | 100       | Testis |
| M4 | E14.5 | 100       | Testis |
| M5 | E14.5 | 100       | Testis |

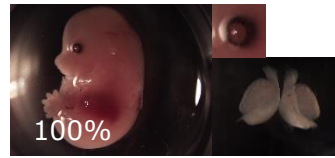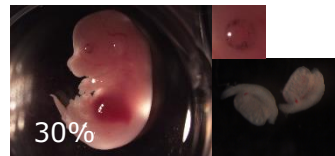

| #   | Stage | Chimerism | Gonad  |
|-----|-------|-----------|--------|
| M1  | E16.5 | 70        | Testis |
| M2  | E16.5 | 100       | Testis |
| M3  | E16.5 | 70        | Testis |
| M4  | E16.5 | 60        | Testis |
| M5  | E16.5 | 80        | Testis |
| F1  | E16.5 | 10        | Ovary  |
| M6  | E16.5 | 80        | Testis |
| M7  | E16.5 | 0         | Testis |
| M8  | E16.5 | 100       | Testis |
| M9  | E16.5 | 100       | Testis |
| M10 | E16.5 | 100       | Testis |
| M11 | E16.5 | 0         | Testis |
| M12 | E16.5 | 80        | Testis |
| M13 | E16.5 | 90        | Testis |
| M14 | E16.5 | 90        | Testis |

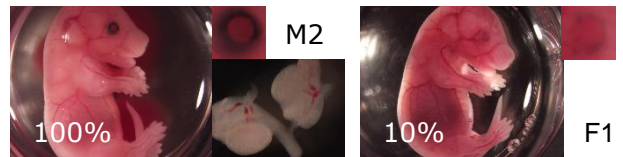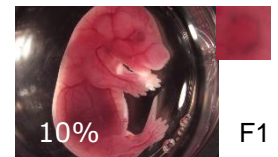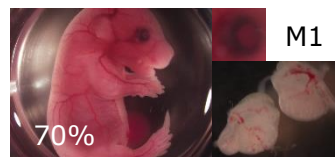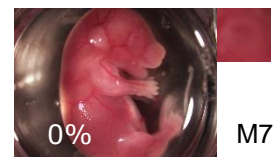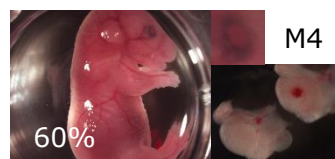

**Figure S1. The efficiency of chimera produced with TGOC ES cells.** Results for chimera production with parental TGOC ESCs. Stage, chimerism and gonadal type are shown. Chimerism was inferred from eye color. Gonadal types were morphologically determined. Representative embryo images are also shown. An E16.5 M2 chimera is shown in Fig.1E and F. M: male and F: female

# Fig.S2

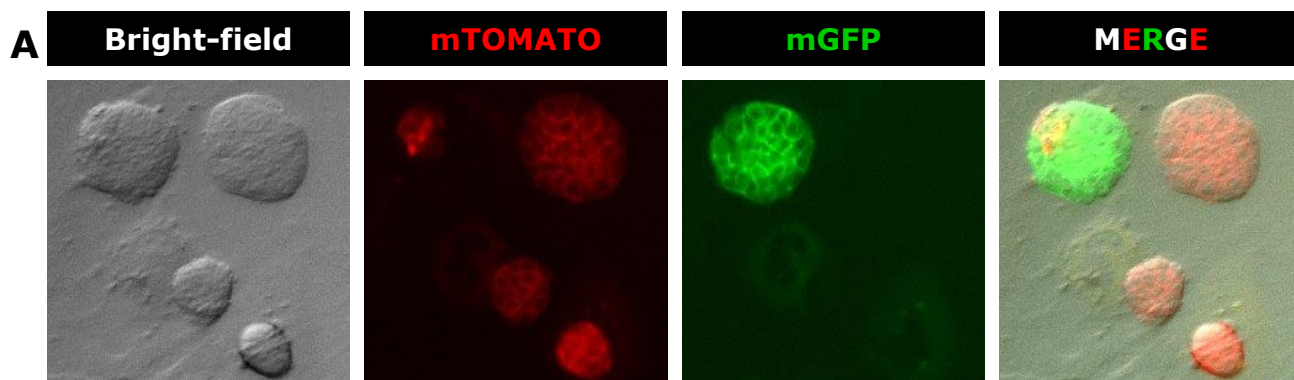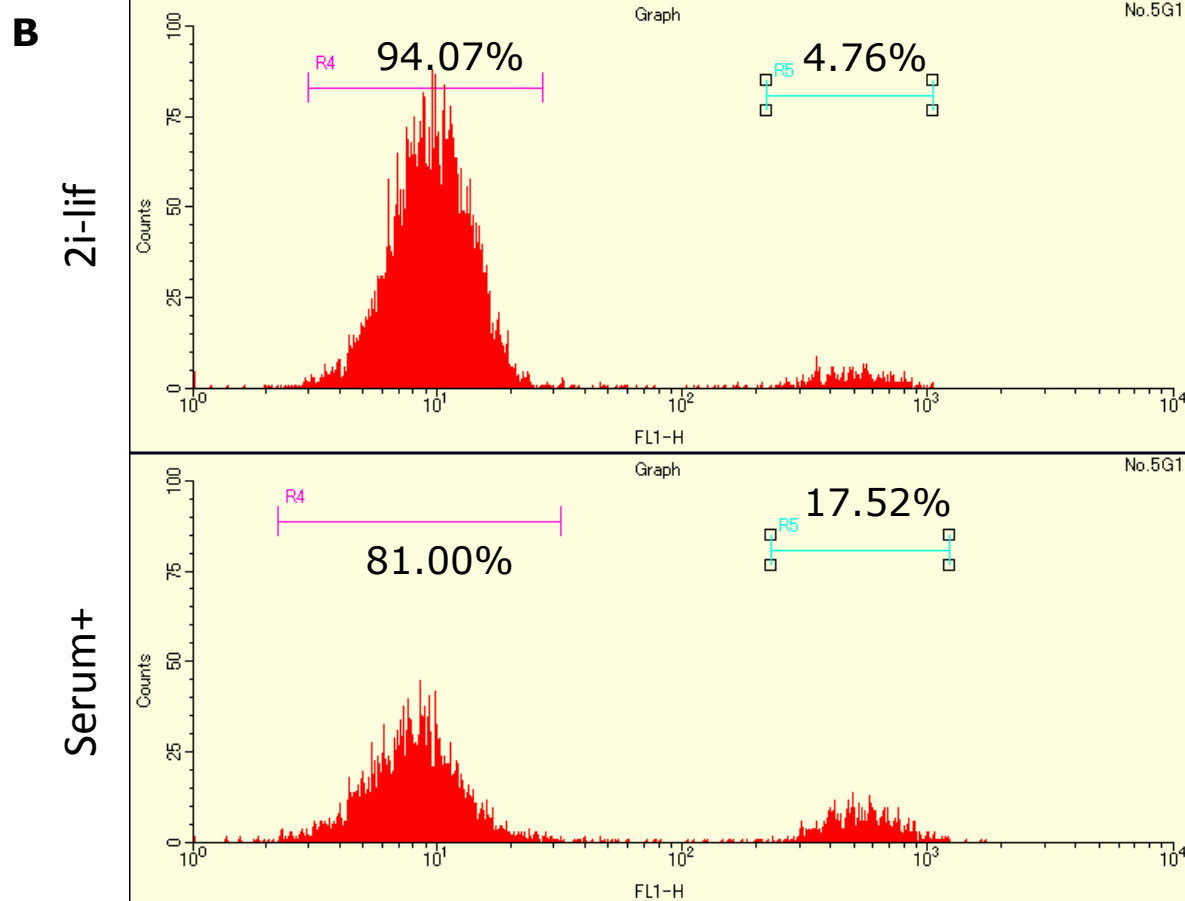

## Figure S2. TGOC ESCs express mTOMATO or mGFP

(A) Expression of membrane anchored fluorescent proteins in TGOC ESCs cultured in 2i-Lif without TM. There are some clones expressing mGFP among the mTOMATO-positive cells. (B) Population differences between 2i-LIF and serum+ culture conditions. The horizontal axis indicates intensity of GFP and the vertical axis indicates cell number.

# Fig.S3

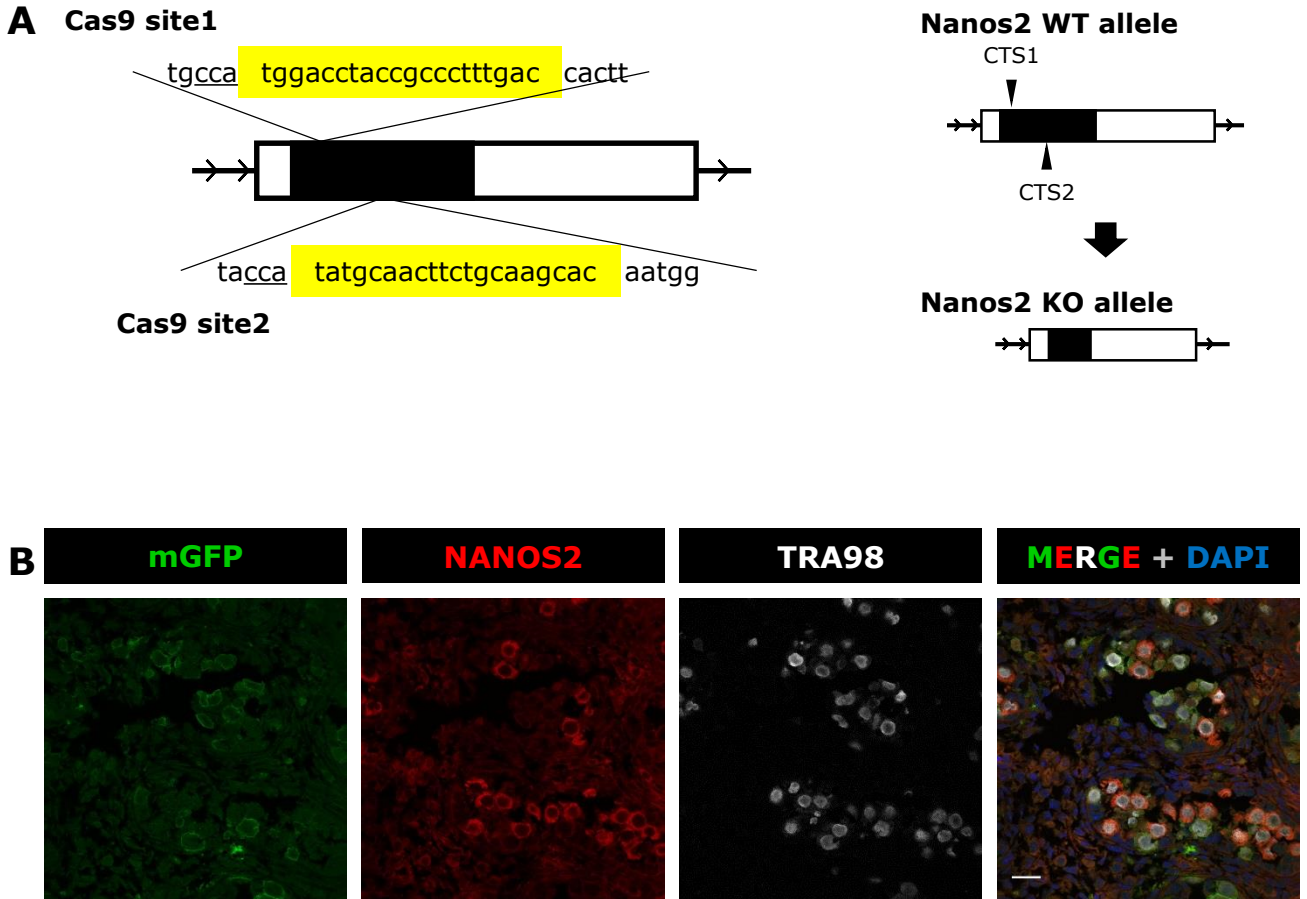

**Figure S3. KO strategy for *Nanos2* using the Cas9-mediated method.** (A) Two Cas9 target sites were designed to eliminate part of the *Nanos2* CDS. CTS: Cas9 Target Site. White boxes indicate the non-CDS and black boxes indicate the CDS. The mutation was introduced in the same TGOC line used for generating *Ddx6*-cKO lines. (B) Immunofluorescence image of chimeric testes produced by *Nanos2*-KO ESCs. mGFP-positive (green) TRA98-positive (white) germ cells lost NANOS2 (red) signal (arrowheads). TM was administered at 11 dpa (E12.5) and embryos were prepared at 15 dpa (E16.5). Scale bars indicate 20  $\mu$ m.

# FigS4

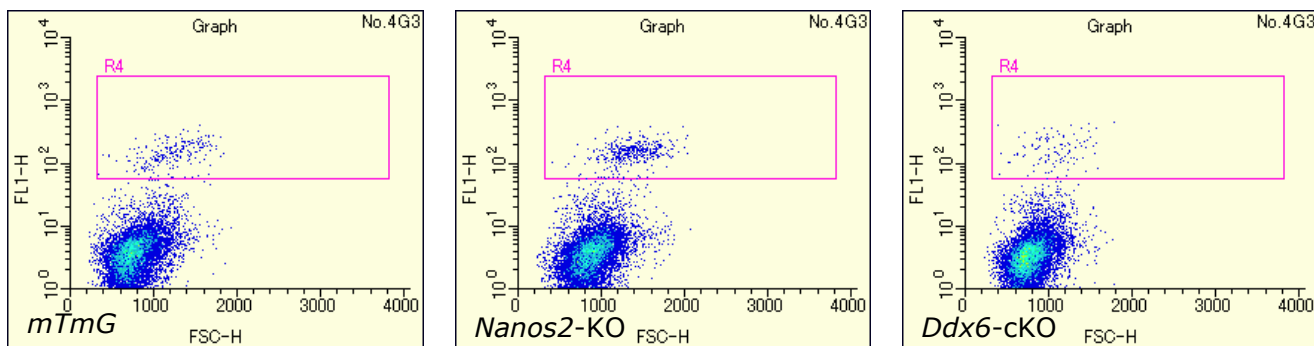

## Figure S4. FACS plot for germ cell collection

For RNA-seq, germ cells were prepared from embryonic chimeric testes produced with TGOC without TM, TGOC/*Nanos2*-KO with TM and TGOC/*Ddx6*-cKO with TM. Each plot shows the GFP intensity on the vertical axis. Purple boxes indicate the sorted GFP-positive population.

# FigS5

## A. Common DEGs

| ID         | Description                                              | Up | Dn | genes                          |
|------------|----------------------------------------------------------|----|----|--------------------------------|
| GO:0043646 | anatomical structure formation involved in morphogenesis | 31 | 49 | <i>Tet1, C3, Nme8, Ccdc113</i> |
| GO:0055001 | muscle cell development                                  | 6  | 16 |                                |
| GO:0048468 | cell development                                         | 44 | 74 | <i>Lefty1, Sox2, Mt2</i>       |
| GO:0055002 | striated muscle cell development                         | 6  | 14 |                                |
| GO:0070206 | protein trimerization                                    | 3  | 8  |                                |
| GO:0048598 | embryonic morphogenesis                                  | 25 | 20 | <i>Sox2</i>                    |
| GO:0030030 | cell projection organization                             | 16 | 62 | <i>Nme8, Ccdc113</i>           |
| GO:0032989 | cellular component morphogenesis                         | 25 | 52 | <i>Ccdc113</i>                 |
| GO:0001704 | formation of primary germ layer                          | 10 | 6  | <i>Sox2</i>                    |
| GO:0048747 | muscle fiber development                                 | 2  | 9  |                                |

## B. NANOS2-specific DEGs

| ID         | Description                                   | Up  | Dn  | genes                                               |
|------------|-----------------------------------------------|-----|-----|-----------------------------------------------------|
| GO:0006811 | ion transport                                 | 66  | 174 | <i>Hpn, Slc51a, Vdr, Enpp1</i>                      |
| GO:0006796 | phospho-containing compound metabolic process | 175 | 257 | <i>Plaur, Hpn, Upp1, Enpp1, Cap2, Adgrg6, Dyrk4</i> |
| GO:0006793 | phosphorus metabolic process                  | 175 | 257 | <i>Plaur, Hpn, Upp1, Enpp1, Cap2, Adgrg6, Dyrk4</i> |
| GO:007155  | cell adhesion                                 | 77  | 181 | <i>Chl1</i>                                         |
| GO:0051049 | regulation of transport                       | 97  | 194 | <i>Vdr, Enpp1, Ahsg</i>                             |
| GO:0022610 | biological adhesion                           | 77  | 182 | <i>Chl1</i>                                         |
| GO:0022607 | cellular component assembly                   | 174 | 196 | <i>Ahsg</i>                                         |
| GO:0048468 | cell development                              | 126 | 225 | <i>Stra8, Chl1, Hpn</i>                             |
| GO:0030001 | metal ion transport                           | 43  | 100 | <i>Hpn, Vdr, Adgrg6</i>                             |
| GO:0006928 | movement of cell or subcellular component     | 73  | 202 | <i>Chl1</i>                                         |

## C. DDX6-specific DEGs

| ID         | Description                                                    | Up | Dn | genes                           |
|------------|----------------------------------------------------------------|----|----|---------------------------------|
| GO:0010468 | regulation of gene expression                                  | 67 | 41 | <i>Otx2, Etv5, Lhx1, Prdm14</i> |
| GO:0045165 | cell fate commitment                                           | 13 | 4  | <i>Otx2, Prdm14</i>             |
| GO:0019219 | regulation of nucleobase-containing compound metabolic process | 63 | 38 | <i>Otx2, Etv5, Lhx1, Prdm14</i> |
| GO:0051252 | regulation of RNA metabolic process                            | 60 | 34 | <i>Otx2, Etv5, Lhx1, Prdm14</i> |
| GO:0035456 | response to interferon-beta                                    | 8  | 0  |                                 |
| GO:2001141 | regulation of RNA biosynthetic process                         | 58 | 33 | <i>Otx2, Etv5, Lhx1, Prdm14</i> |
| GO:0006351 | transcription, DNA-templated                                   | 53 | 31 | <i>Otx2, Etv5, Lhx1, Prdm14</i> |
| GO:0006355 | regulation of transcription, DNA-templated                     | 57 | 33 | <i>Otx2, Etv5, Lhx1, Prdm14</i> |
| GO:1903506 | regulation of nucleic acid-templated transcription             | 57 | 33 | <i>Otx2, Etv5, Lhx1, Prdm14</i> |
| GO:0006366 | transcription from RNA-polymerase II promoter                  | 34 | 19 | <i>Otx2, Etv5, Lhx1, Prdm14</i> |

## Figure S5. GO analysis for DEGs

The top 10 GO terms (biological processes) for common (A), *Nanos2*-KO-specific (B) and *Ddx6*-KO-specific (C) DEGs were presented. The gene names shown in Fig. 6D-F are indicated as assigned.

# Source image

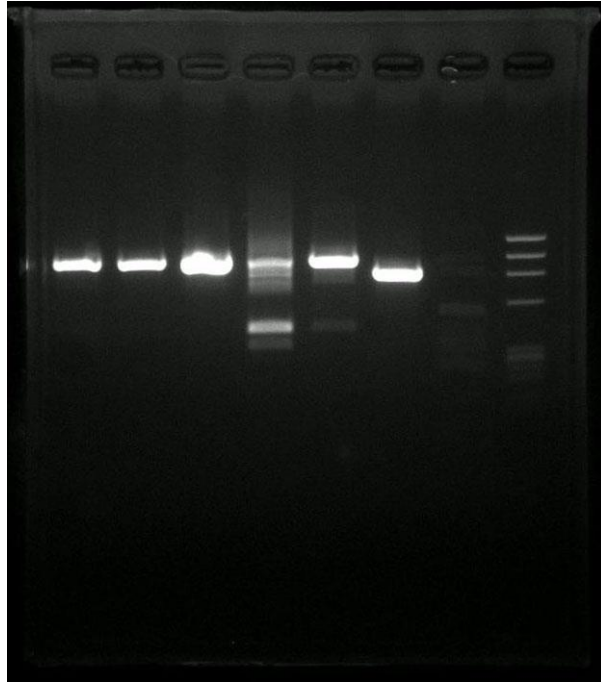

Source image of Fig.2C
